# Supplementary material for: COVID-19 Lockdown: Impact on Oral Health-Related Behaviors and Practices of Portuguese and Spanish Children
Source: MDPI journal article supplement (doi:10.3390/ijerph192316004), 2022-11-30
Supplement: s1 [file s1]

*This questionnaire is self-completed and is intended to assess the possible impact of COVID-19 confinement on the oral health of Portuguese and Spanish children. Answers must be based on **the last period of confinement**, and each questionnaire **must concern only one child**. It is estimated that filling in does not take more than 5 minutes. All responses will be treated with criteria respecting confidentiality and anonymization.*

*Thank you for your participation!*

I agree to participate in this study, having been aware of its objectives by reading the informed consent (place hyperlink). I confirm that my participation as guardian of the child is voluntary and I understand that I can withdraw from filling in at any time, without any kind of prejudice.

a) Yes

b) No: **END OF QUESTIONNAIRE** (does not meet an inclusion criterion)

## **SOCIOECONOMIC DATA**

### **About the child:**

#### **1. Age**

\_\_\_\_\_ years and \_\_\_\_\_ months

#### **2. Gender**

a. Female

b. Male

#### **3. Country of residence**

a. Spain

b. Portugal

c. Other: **END OF QUESTIONNAIRE** (does not meet an inclusion criterion)

**4. Place of residence**

- a. Rural
- b. Urban

**5. Did the child have siblings in the household during the COVID-19 lockdown?**

- a. Yes

IF YES: How many of them were minors? Open question; quantitative variable

- b. No

**6. Did the child's lifestyle routine significantly changed because of COVID-19 confinement?**

- a. Yes
- b. No

**7. Did the child have online school activities during the COVID-19 lockdown?**

- a. Yes
- b. No

**8. Did the child experience any of the following emotional states or problems during COVID-19 lockdown? \*(You can select one or more options)**

- a. Nervousness
- b. Loneliness
- c. Annoyance
- d. Disinterest
- e. Rage
- f. Fear
- g. Anxiety about going to public places
- h. Other reason - specify \_\_\_\_\_
- i. I don't know
- j. I do not want to answer

**About the respondent:**

**1. Did the person responding to this questionnaire live with the child during COVID-19 lockdown?**

- a. Yes
- b. No: END OF QUESTIONNAIRE (does not meet an inclusion criterion).

**2. What is your relationship with the child?**

- a. Dad
- b. Mother
- c. Grandfather or grandmother
- d. Uncle or aunt
- e. Brother or sister
- f. Other relative, specify\_\_\_\_\_
- g. Other non-relative, specify\_\_\_\_\_

**3. Was the person who is responding to this questionnaire the child's primary caregiver during COVID-19 lockdown?**

- a. Yes
- b. No

IF THE ANSWER WAS NO: Who was the child's primary caregiver during COVID-19 lockdown?

- a. Dad
- b. Mother
- c. Grandfather or grandmother
- d. Uncle or aunt
- e. Brother or sister
- f. Other relative, specify\_\_\_\_\_
- g. Other non-relative, specify\_\_\_\_\_

**About the child's family:****1. Education level of the child's primary caregiver?**

- a. No studies
- b. Primary or secondary education
- c. Bachelor's / Graduation
- d. Master, Postgraduate or Doctorate
- e. I don't know
- f. I do not want to answer

**2. What is the occupation of the child's mother?**

- a. Group I: Large businessmen, top managers in the public or private sector, university professors, senior military officers, liberal professions with higher education, senior political leaders
- b. Group II: Medium-sized entrepreneurs, business managers, intermediate managers and technical staff in the public or private sector, armed forces officers, basic or secondary education teachers
- c. Group III: Small businessmen, middle managers, medium farmers, sergeants or equivalent
- d. Group IV: Small farmers and tenants, administrative technicians, semi-skilled workers, civil servants and members of the armed or militarized forces not yet mentioned
- e. Group V: Agricultural wage earners, undifferentiated workers or professions not yet mentioned
- f. I don't know
- g. I do not want to answer

**3. What is the occupation of the child's father?**

- a) Group I: Large businessmen, top managers in the public or private sector, university professors, senior military officers, liberal professions with higher education, senior political leaders
- b) Group II: Medium-sized entrepreneurs, business managers, intermediate managers and technical staff in the public or private sector, armed forces officers, basic or secondary education teachers
- c) Group III: Small businessmen, middle managers, medium farmers, sergeants or the like
- d) Group IV: Small farmers and tenants, administrative technicians, semi-skilled workers, civil servants and members of the armed or militarized forces not yet mentioned
- e) Group V: Agricultural wage earners, undifferentiated workers or professions not yet mentioned
- f. I don't know
- g. I do not want to answer

**4. What was the employment status of the child's primary caregiver during COVID-19 confinement?**

- a. Worked outside the home part-time
- b. Worked outside the home full-time
- c. Worked from home part-time
- d. Worked from home full time
- e. Did not work and stayed at home
- f. Other situation, such as: student, maternity or paternity leave

**5. Did the child's family experienced significant income changes during COVID-19 lockdown?**

- a. Increase
- b. Without changes
- c. Slight reduction
- d. Drastic reduction
- e. Total loss
- f. I don't know
- g. I do not want to answer

**6. What is the marital status of the child's parents?**

- a. Married
- b. Divorced
- c. Widower
- d. In a relationship
- e. Single
- f. Other
- g. I don't know
- h. I do not want to answer

## EATING HABITS

**1. In general, did the child change his/her eating habits during COVID-19 confinement? \***(You can select one or more options)

- a. No changes
- b. More snacks (intermediate meals)
- c. Fewer snacks (in-between meals)
- d. Higher intake of sugary and processed foods or beverages (e.g. soda, candy, and crackers)
- e. Higher intake of healthy foods (e.g. fruits and vegetables)
- f. I don't know
- g. I do not want to answer

**2. Excluding main meals (breakfast, lunch and dinner), on how many occasions a day did the child eat food during COVID-19 confinement?**

- a. One time
- b. Twice
- c. 3 times
- d. 4 times
- e. 5 or more times
- f. I don't know
- g. I do not want to answer

3. Please indicate the frequency of ingestion of each of the following foods (between main meals) during COVID-19 lockdown.

| Snacks                                                            | Ingestion frequency  |                  |                 |            |             |              |                   |
|-------------------------------------------------------------------|----------------------|------------------|-----------------|------------|-------------|--------------|-------------------|
|                                                                   | Less than once/ week | 1- 3 times/ week | 4-6 times/ week | Once a day | Twice a day | 3 times/ day | 4 or + times/ day |
| Dried fruits and/or fresh fruits                                  |                      |                  |                 |            |             |              |                   |
| Candy, chocolate                                                  |                      |                  |                 |            |             |              |                   |
| Salty snacks (e.g. potato chips, salted popcorn, salted crackers) |                      |                  |                 |            |             |              |                   |
| Cakes, sweet cookies, ice cream                                   |                      |                  |                 |            |             |              |                   |
| Sugar cereals, cereal bars                                        |                      |                  |                 |            |             |              |                   |
| Bread or sandwich                                                 |                      |                  |                 |            |             |              |                   |



4. Please indicate the frequency of ingestion of each of the following beverages during COVID-19 lockdown.

| Beverages                                        | Ingestion frequency  |                  |                 |            |             |              |                   |
|--------------------------------------------------|----------------------|------------------|-----------------|------------|-------------|--------------|-------------------|
|                                                  | Less than once/ week | 1- 3 times/ week | 4-6 times/ week | Once a day | Twice a day | 3 times/ day | 4 or + times/ day |
| Homemade fruit juice                             |                      |                  |                 |            |             |              |                   |
| Industrial fruit juice                           |                      |                  |                 |            |             |              |                   |
| Soda                                             |                      |                  |                 |            |             |              |                   |
| Energetic drinks                                 |                      |                  |                 |            |             |              |                   |
| Sweetened/chocolate milk and/or sweetened yogurt |                      |                  |                 |            |             |              |                   |
| Plain milk, dairy products                       |                      |                  |                 |            |             |              |                   |

## **ORAL HYGIENE HABITS**

### **1. How often did the child toothbrush during COVID-19 confinement?**

- a. Not daily
- b. Once a day
- c. Twice a day
- d. More than twice a day
- e. I don't know
- f. I do not want to answer

### **2. Was there any change in the child's toothbrushing frequency during COVID-19 confinement?**

- a. Unchanged
- b. Increased
- c. Decreased
- d. I don't know
- e. I do not want to answer

### **3. Did the child receive help/supervision during toothbrushing prior to COVID-19 lockdown?**

- a. Daily
- b. Frequently
- c. Occasionally
- d. Never
- e. I don't know
- f. I do not want to answer

**4. Did the child receive help/supervision during toothbrushing in COVID-19 confinement?**

- a. Daily
- b. Frequently
- c. Occasionally
- d. Never
- e. I don't know
- f. I do not want to answer

**5. How often did the child ~~children~~ use dental floss during COVID-19 confinement?**

- a. Not daily
- b. Once a day
- c. Twice a day
- d. More than twice a day
- d. I don't know
- e. I do not want to answer

**6. Was there ~~been~~ any change in the child's frequency of flossing in ~~children~~ during COVID-19 confinement?**

- a. Unchanged
- b. Increased
- c. Decreased
- d. I don't know
- e. I do not want to answer

**7. Do you consider that the child's oral hygiene changed during COVID-19 confinement?**

- a. Unchanged
- b. Got worse
- c. Improved
- d. I don't know
- e. I do not want to answer

## **CHILD'S ORAL HEALTH STATUS AND ACCESS TO ORAL HEALTH CARE**

**1. How would you describe the child's oral health status during COVID-19 confinement compared to the previous period?**

- a. Unchanged
- b. Got worse
- c. Improved
- d. I don't know
- e. I do not want to answer

**2. Was the child being followed up by the dentist before the COVID-19 confinement? \*(You can select one or more options)**

- a. Yes, for dental caries treatment
- b. Yes, for orthodontic treatment
- c. Yes, for toothache
- d. Yes, due to dental trauma
- e. Yes, for another reason - specify \_\_\_\_\_
- f. No
- g. No, the child was never gone
- h. I don't know
- i. I do not want to answer

**3. During COVID-19 lockdown, did the child have any of the following oral conditions that were not treated? \*(You can select one or more options)**

- a. Dental caries
- b. Gingival swelling
- c. Gingival bleeding
- d. Dental trauma
- e. Loss or fracture of a dental restoration
- f. Halitosis
- g. None

- h. I don't know
- i. I do not want to answer

**4. Did you detect any new caries lesions in the child's teeth during COVID-19 confinement?**

- a. Yes
- b. No
- c. I don't know
- d. I do not want to answer

**5. Did the child suffer any dental trauma during COVID-19 confinement?**

- a. Yes
- b. No
- c. I don't know
- d. I do not want to answer

**6. Did the child have a toothache during COVID-19 confinement?**

- a. Yes
- b. No
- c. I don't know
- d. I do not want to answer

**7. Did the child attend any dental appointment during COVID-19 confinement?**

- A. Yes

IF YES: Why? \*(You can select one or more options)

- a. For a routine consultation
- b. For a pre-scheduled dental treatment (e.g. orthodontic appointments)
- c. For an urgent consultation for a toothache
- d. For an urgent appointment due to an abscess
- e. For an urgent appointment due to a dental trauma
- f. For an urgent appointment due to tooth decay
- g. For an urgent appointment due to a loss or fracture of a dental restoration
- h. For another reason - specify \_\_\_\_\_

- i. I don't know
- j. I do not want to answer

**B. No**

IF THE ANSWER IS NO: Why? \*(You can select one or more options)

- a. Because there was no need
- b. For fear of transmission of COVID-19 during dental treatment
- c. Due to suspension of the activity of dental clinics
- d. For financial reasons
- e. Because dental treatment was not urgent
- f. Because the child or her parents were infected with COVID-19
- g. For another reason - specify \_\_\_\_\_
- h. I don't know
- i. I do not want to answer

**8. Regarding the frequency of medical and dental consultations of the child during the confinement by COVID-19, compared to the previous period, I would consider that:**

- a. The child received less medical and dental follow-up during confinement
- b. The child received more medical and dental care during confinement
- c. Without changes
- d. I don't know
- e. I do not want to answer
